# Supplementary material for: A mesoporous WN co-doped titania nanomaterial with enhanced photocatalytic aqueous nitrate removal activity under visible light
Source: Royal Society of Chemistry journal article supplement (doi:10.1039/c1cy00042j), 2011-01-01
Supplement: c1cy00042j.pdf [file c1cy00042j.pdf]

## Mesoporous WN co-doped titania nanomaterial with enhanced photocatalytic aqueous nitrate removal activity under visible light

T. Mishra\*, M. Mahato, Noor Aman, J. N. Patel, R. K. Sahu

Surface Engineering Group, ACC Division, National Metallurgical Laboratory,  
CSIR, Jamshedpur-831007, India

Mail: [drtmishra@yahoo.com](mailto:drtmishra@yahoo.com)

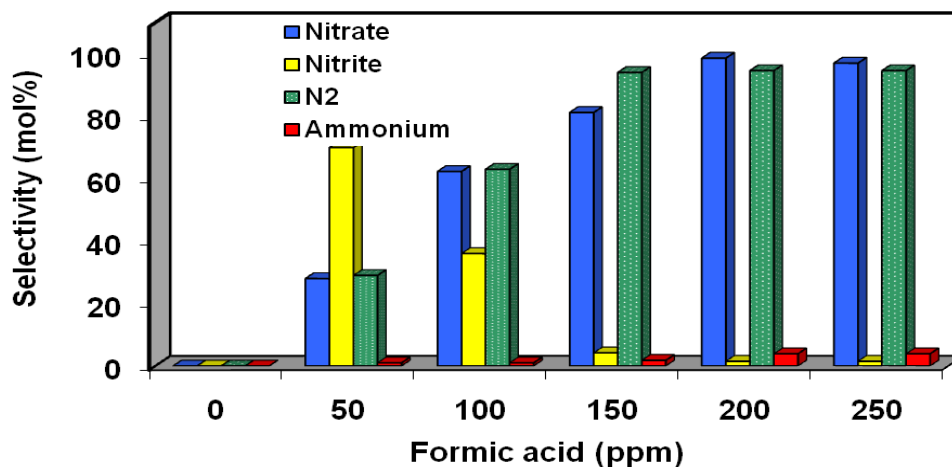

FigS1: Effect of formic acid concentration on nitrate conversion.

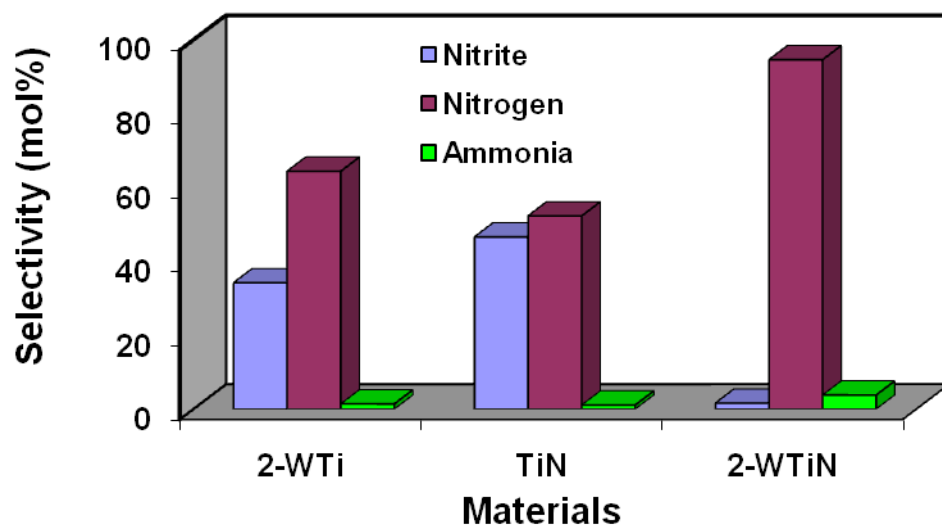

FigS2: Product selectivity on different catalysts after 60min of reaction.

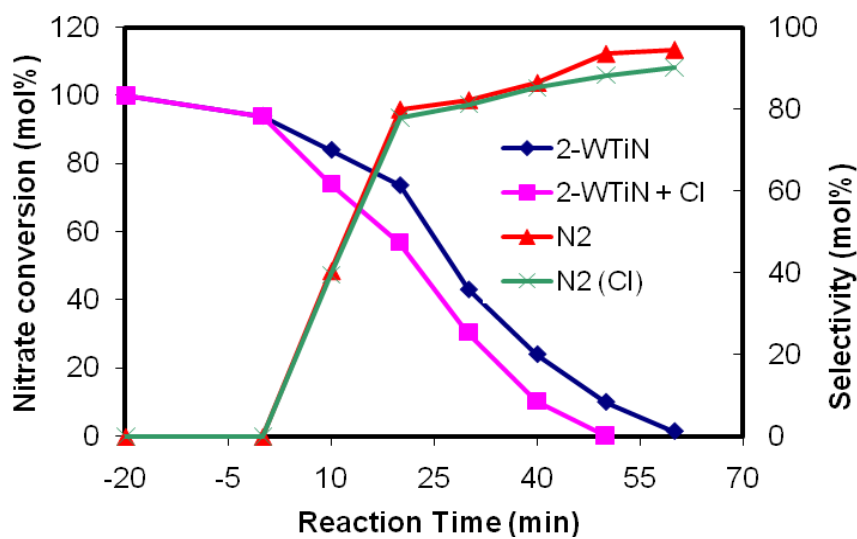

FigS3: Effect of chloride ion on the nitrate conversion and product selectivity.
